# Supplementary material for: Hydrothermal Unzipping of Multiwalled Carbon Nanotubes and Cutting of Graphene by Potassium Superoxide
Source: MDPI journal article supplement (doi:10.3390/nano12030447), 2022-01-28
Supplement: s1 [file s1]

## Supplementary Materials

# Hydrothermal Unzipping of Multiwalled Carbon Nanotubes and Cutting of Graphene by Potassium Superoxide

Apostolos Koutsioukis <sup>1</sup>, Konstantinos Spyrou <sup>2</sup>, Nikolaos Chalmes <sup>2</sup>, Dimitrios Gournis <sup>2,\*</sup> and Vasilios Georgakilas <sup>1,\*</sup>

<sup>1</sup> Department of Materials Science, University of Patras, 26504 Rio, Greece; up1057091@upatras.gr

<sup>2</sup> Department of Materials Science and Engineering, University of Ioannina, 45110 Ioannina, Greece; konstantinos.spyrou1@gmail.com (K.S.); chalmesnikos@gmail.com (N.C.)

\* Correspondence: dgourni@uoi.gr (D.G.); viegeorgaki@upatras.gr (V.G.)

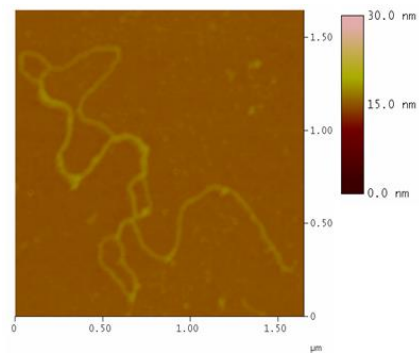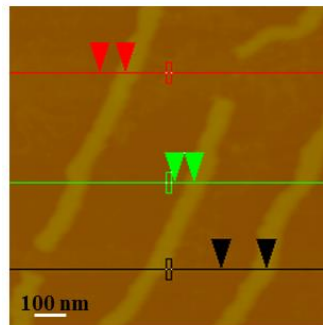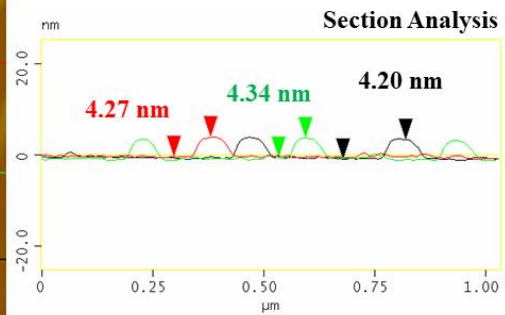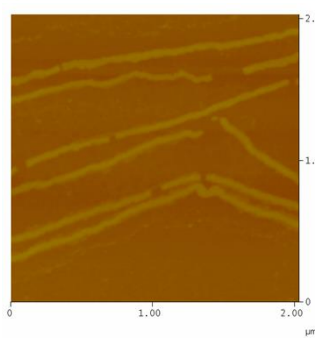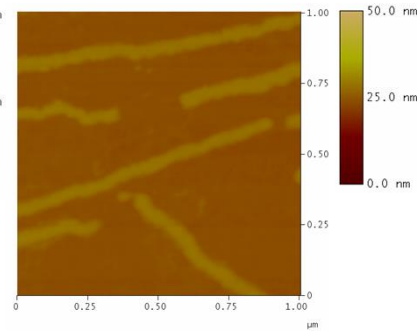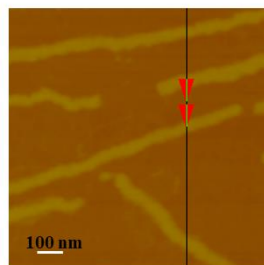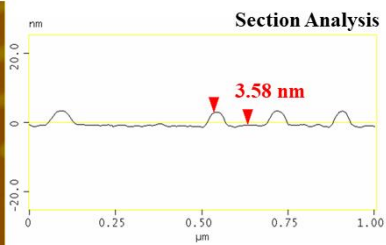

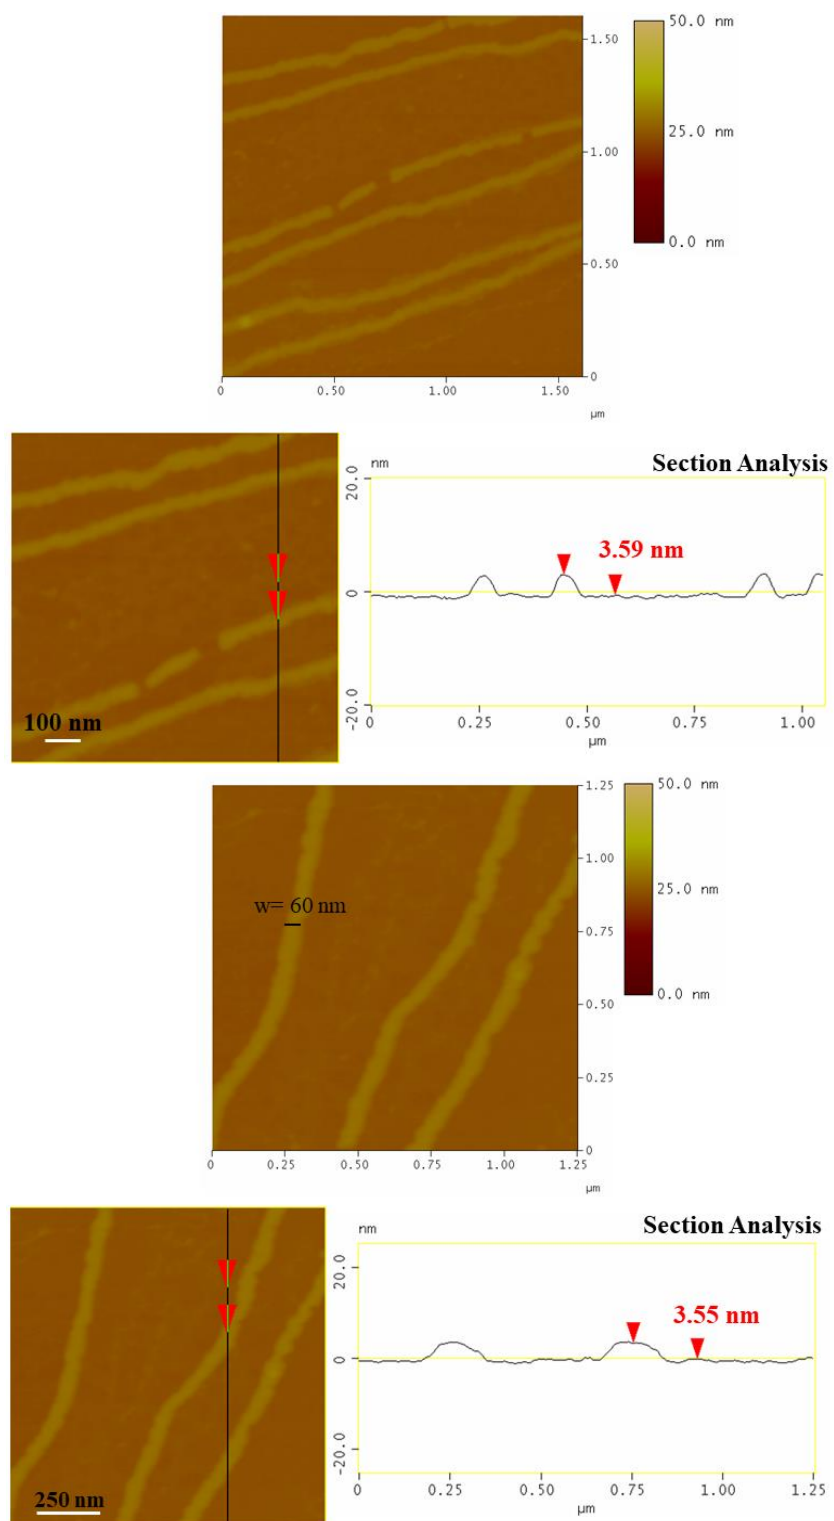

**Figure S1.** AFM images of GNR from sample NR<sub>1</sub>.

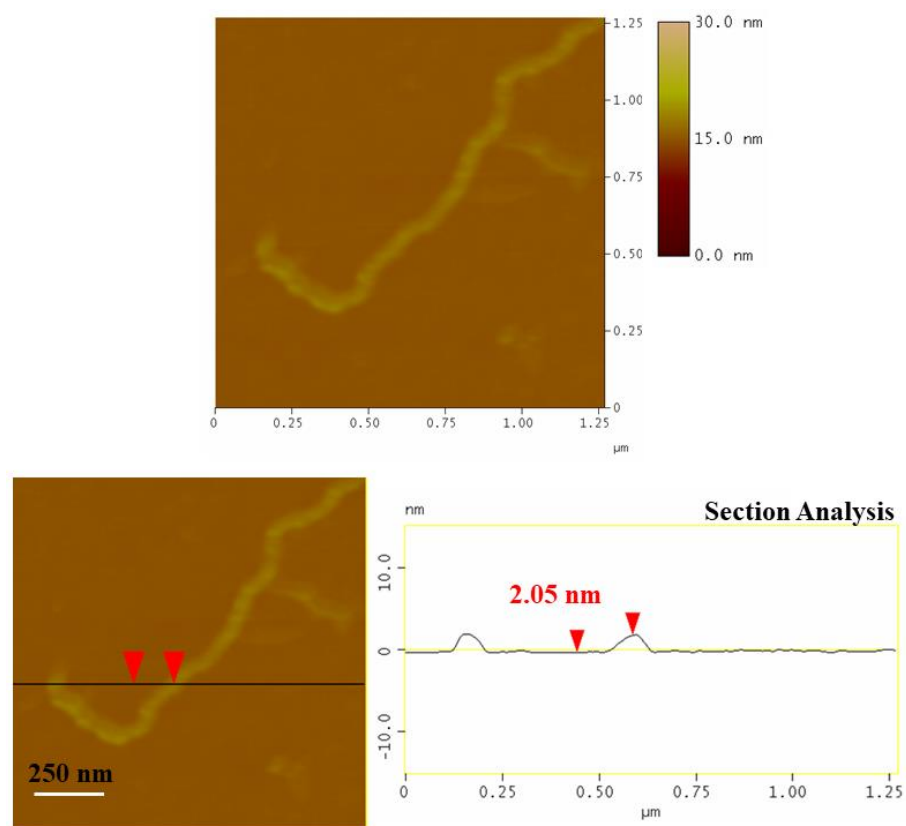

**Figure S2.** AFM images of GNR from the sample NR2.
